# Supplementary material for: Variation in waiting times by diagnostic category: an observational study of 1,951 referrals to a neurology outpatient clinic
Source: HighWire-hosted journal article supplement (doi:10.1136/bmjno-2021-000133), 2021-06-01
Supplement: bmjno-2021-000133supp001_data_supplement.pdf [file bmjno-2021-000133supp001_data_supplement.pdf]

1    Supplementary Materials

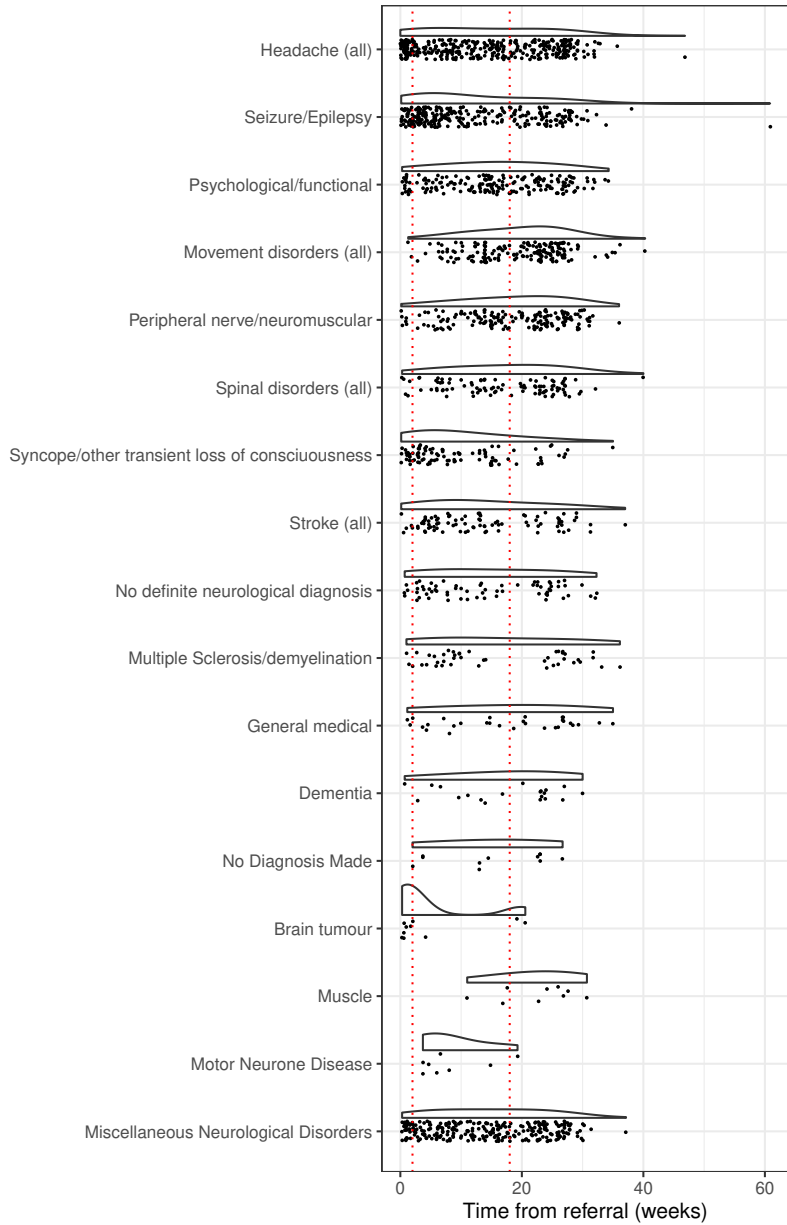

Figure 1: Distribution of waiting time from referral to new appointment including outliers and small categories.

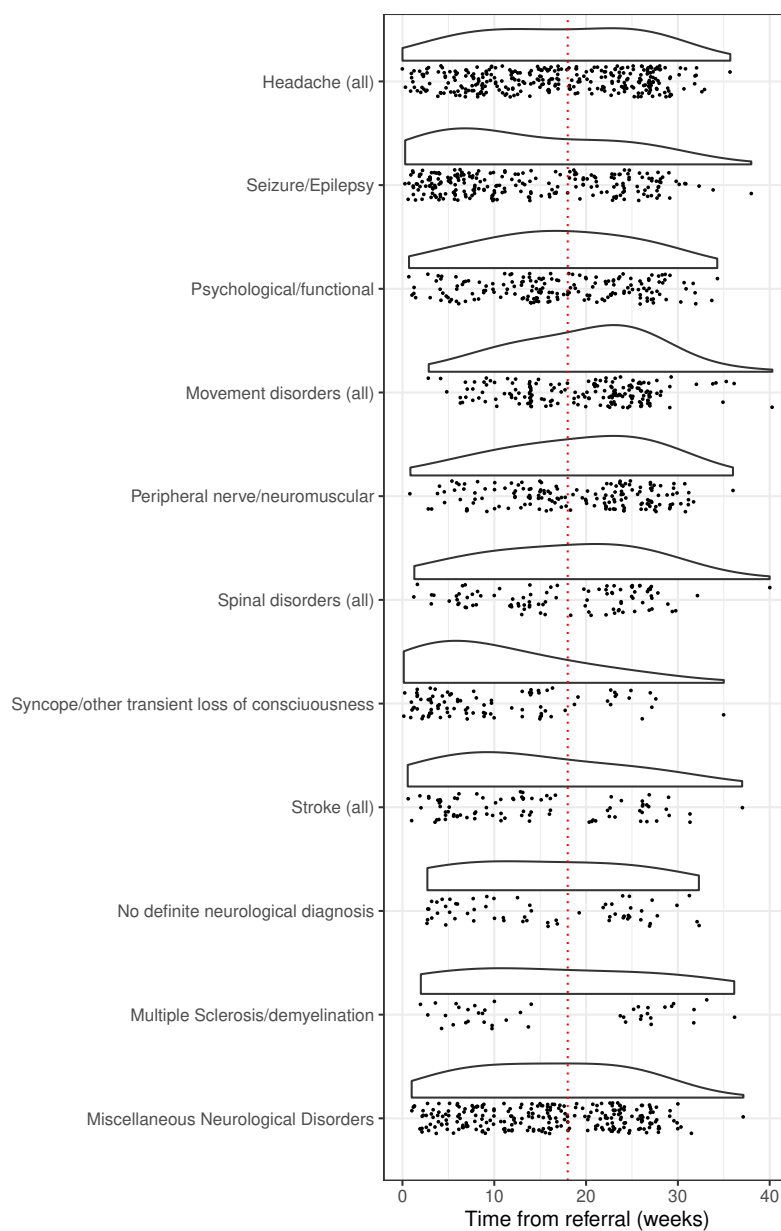

Figure 2: Distribution of waiting time from referral to new appointment after removing patients referred on a 2 week pathway for suspected CNS cancer or a first seizure.

|                          | Seizure/Epilepsy       | Psychological/ Functional | Movement Disorders      | Peripheral nerve/ neuromuscular |
|--------------------------|------------------------|---------------------------|-------------------------|---------------------------------|
| Headache (all)           | $2.0 \times 10^{-5} *$ | 0.15                      | $1.3 \times 10^{-4} *$  | $4.4 \times 10^{-3}$            |
| Seizure/Epilepsy         |                        | $1.9 \times 10^{-7} *$    | $3.6 \times 10^{-14} *$ | $2.0 \times 10^{-10} *$         |
| Psychological/Functional |                        |                           | $3.3 \times 10^{-3}$    | 0.05                            |
| Movement Disorders       |                        |                           |                         | 0.41                            |

Table 1: P-values from pairwise Kolmogorov-Smirnov tests of the empirical cumulative distributions of waiting time for the 5 most common diagnostic categories. \*indicates statistical significance at  $\alpha = 0.05$  using Bonferroni corrections for multiple testing.
